# Supplementary material
Source: PubMed Central journal article supplement (PMC5034047)
Supplement: 10.1074_M116.730432_jbc.M116.730432-1.pdf [file 10.1074_M116.730432_jbc.M116.730432-1.pdf]

## Supplementary Material

### **Human Naa50 displays broad substrate specificity for N-terminal acetylation: Detailed Structural and Biochemical Analysis Using Peptide Library**

Ravikumar Reddi<sup>1</sup>, Venkateshwarlu Saddanapu<sup>1</sup>, Dinesh Kumar Chinthapalli<sup>2</sup>, Priyanka Sankuju<sup>1</sup>, Prabhakar Sripadi<sup>2</sup> and Anthony Addlagatta\*<sup>1</sup>

<sup>1</sup>Centre for Chemical Biology, <sup>2</sup>National Centre for Mass Spectrometry, CSIR-Indian Institute of Chemical Technology, Hyderabad, INDIA.

## **Included Supplementary Material**

- 1. Supplementary Table S1:** The list of primers used to test the transcription profile of all 10 genes of six Nat complexes. GAPDH primers were used as control.
- 2. Supplementary Figure S1:** Relative N-acetyl transferase activity of NAA50 against forty synthetic tetrapeptides. a) Activity against XAAA series where a high selectivity is observed for MAAA followed by LAAA peptides. Results are represented in percentage activity with respect to MAAA as standard because of its maximal activity. b) The MXAA series of synthetic peptides were tested against NAA50 for activity. MMAA peptides was used as reference (100% activity).

**Table S1.** The list of primers used to test the expression profile of all 10 N-acetyl transferases and GAPDH primers.

| <b>Gene</b>  | <b>Primer sequences</b>                           | <b>Uniprot accession number</b> |
|--------------|---------------------------------------------------|---------------------------------|
| <i>NAA10</i> | GCCATCGAGAACAAGGTGGA<br>AGGCTCTAGGAGGCTGAGTC      | P41227                          |
| <i>NAA20</i> | TTACCTGCGACGACCTGTTC<br>GGTGCCTCTGCAACAATGA       | P61599                          |
| <i>NAA30</i> | CCGAGCTACAAATGCCCGATA<br>CACCTACACACTCCTCCCCTA    | Q147X3                          |
| <i>NAA40</i> | CTAGGCCTTGTTCTTCCAG<br>AGGTCAGAGGGACCAACAGA       | Q86UY6                          |
| <i>NAA50</i> | TCCAGTCAGCTACAATGACAAGT<br>CCTTCGGTAAGGTGCCAGAC   | Q9GZZ1                          |
| <i>NAA60</i> | ATCGAGTACCCAGACTCATGG<br>TGTGTCAACAGAGAAGTTGGATG  | Q9H7X0                          |
| <i>NAA15</i> | TGTGTGTTGGCACGTTTATGG<br>CGTTTCCCTGTAACCCTCAAGA   | Q9BXJ9                          |
| <i>NAA25</i> | TCCTGCTGAAGGTGAACACTC<br>TTGACTTCGTAAACGCCTAATCA  | Q14CX7                          |
| <i>NAA35</i> | GTGACCACGGGAGAAGCATA<br>CTTGGGTAATGTCCACCCAGT     | Q5VZE5                          |
| <i>NAA38</i> | GCATTCGCATGACAGATGGAC<br>CGACGGCTTGAGGAACTCC      | Q9BRA0                          |
| <i>GAPDH</i> | CAAGGTCATCCATGACAACCTTG<br>GTCCACCACCCTGTTGCTGTAG | P04406                          |

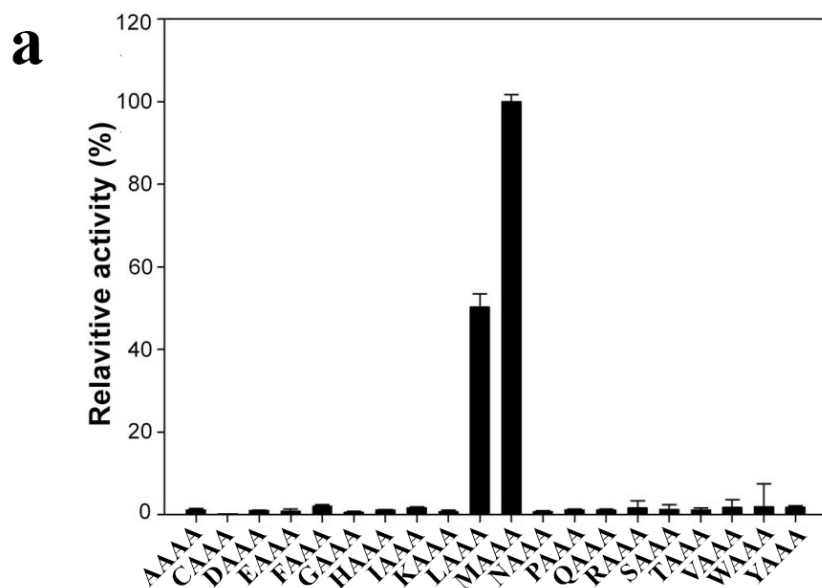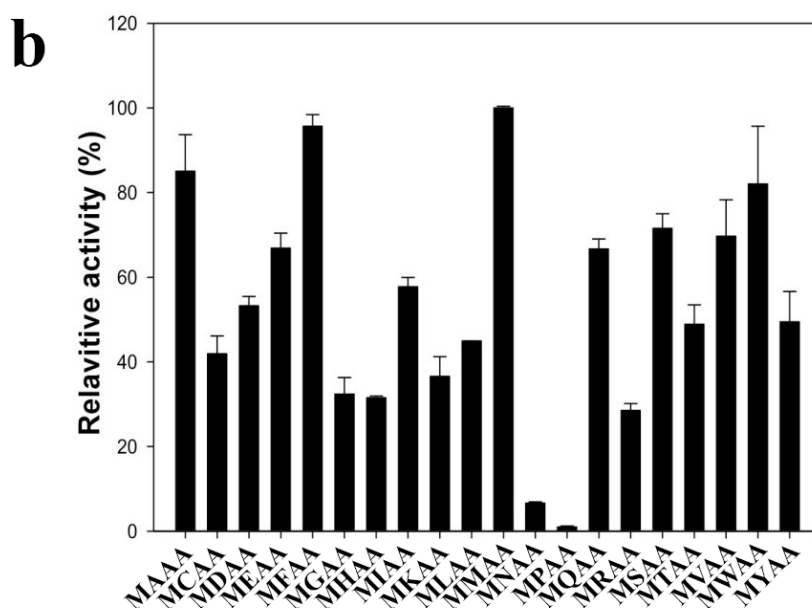

**Supplementary Figure S1:** Relative N-acetyl transferase activity of NAA50 against forty synthetic tetrapeptides. a) Activity against XAAA series where a high selectivity is observed for MAAA followed by LAAA peptides. Results are represented in percentage activity with respect to MAAA as standard because of its maximal activity. b) The MXAA series of synthetic peptides were tested against NAA50 for activity. MMAA peptides was used as reference (100% activity).
